# Supplementary material for: Rhodium catalyzed asymmetric hydroformylation of vinylarenes with a diphosphite ligand forming a large chelating ring†
Source: Royal Society of Chemistry journal article supplement (doi:10.1039/b105208j), 2001-01-01
Supplement: b105208j.doc [file b105208j.doc]

SUPPLEMENATARY MATERIAL

NMR data for (*R*)‑phtabinphos [1].

31P{1H}-RMN: 101.3 MHz, CDCl3,  (ppm).145.8

1H-RMN: 250 MHz, CDCl3,  (ppm), J (Hz).1.17 (d, 6H, 3JCH-CH3=6.6, CHC*H3*CHH'); 4.20 (dd, 2H, 2JCHH’-CHH'=11.6, 3JCH-CHH’=8.1, CHCH3CH*H'*); 4.24 (dd, 2H, 2JCHH’-CHH'=11.6, 3JCH-CHH’=3.2, CHCH3C*H*H'); 4.58 (m, 2H, 3JCH3-CH=6.6, 3JCHH’-CH=3.2, 3JCHH’-CH=8.1, 3JCP-H=4.5, C*H*CH3CHH'); 7.4 (t, 1H, 3JHarom4-Harom5=3JHarom6-Harom5=7.8, *Harom.5*); 8.2 (dd, 2H, 3JHarom5-Harom4=3JHarom5-Harom6=7.8, 4JHarom2Harom4=4JHarom2-Harom6=1.6, *Harom.4 y 6*); 8.8 (t, 1H, 4JHarom4-Harom2=4JHarom6-Harom2=1.6, *Harom. 2*), 7.0-7.33, 7.7-7.83 (m, 24H, *H* binaphtoxi)

13C-RMN: 63 MHz, CDCl3,  (ppm), J (Hz). 18.8 (s, 2C, CH3); 68.5 (s, 2C,*C*H2); 70.3 (d, 2C, 2JP-C=13.8, *C*H); 121.6 (d, 4C, J=5.7); 124.9 (d, 4C, J=9.4); 126.1 (d, 4C, J=6.9); 127.0 (s, 4C); 128.8 (s, 4C); 128.6 (s, 1C, *C 5*); 130.2 (s, 2C, *C 1 y 3*); {132.7, 132.6}, {131.5, 131.0}, {130.9, 129.8} (2s, 2s, 2s, 4C + 4C + 4C, *Cb 1 y 1’, Cb 5 y 5’, Cb 10 y 10’*); 131.0 (s, 1C, *C 2*); 134.2 (s, 2C, *C 4 y 6*); 148.0, 147.4 (2s, 4C, *Cb 2 y 2’*); 165.4 (s, 2C, *C*O).

NMR data for (*S*)-ftabinfos [5].

31P{1H}-RMN: 101.3 MHz, CDCl3,  (ppm).148.6.

1H-RMN: 250 MHz, CDCl3,  (ppm), J (Hz). 1.17 (d, 6H, 3JCH-CH3=6.6, CHC*H3*CHH'); 4.23 (dd, 2H, 2JCHH’-CHH'=11.6, 3JCH-CHH’=8.1, CHCH3CH*H'*); 4.29 (dd, 2H, 2JCHH’-CHH'=11.6, 3JCH-CHH’=3.2, CHCH3C*H*H'); 4.66 (m, 2H, 3JCH3-CH=6.6, 3JCHH’-CH=3.2, 3JCHH’-CH=8.1, 3JCP-H=8.4, C*H*CH3CHH'); 7.6 (t, 1H, 3JHarom4-Harom5=3JHarom6-Harom5=7.8, *Harom.5*); 8.4 (dd, 2H, 3JHarom5-Harom4=3JHarom5-Harom6=7.8, 4JHarom2Harom4=4JHarom2-Harom6=1.6, *Harom.4 y 6*); 8.8 (t, 1H, 4JHarom4-Harom2=4JHarom6-Harom2=1.6, *Harom. 2*), 7.0-7.33, 7.7-7.83 (m, 24H, *H* binaphtoxi)

13C-RMN: 63 MHz, CDCl3,  (ppm), J (Hz). 19.2 (s, 2C, CH3); 68.4 (s, 2C, *C*H2); 70.1 (d, 2C, 2JP-C=14.8, *C*H); 124.9 (d, 4C, J=9.4; 126.2 (d, 4C, J=5.7); 128.3 (s, 1C, *C 5*); 128.8 (s, 4C); 127.0 (s, 4C); 130.3 (s, 2C, *C 1 y 3*); 131.3 (s, 1C, *C 2*); 134.3 (s, 2C, *C 4 y 6*); {132.8, 132.6}, {131.5, 131.1}, {130.6, 129.8} (2s, 2s, 2s, 4C + 4C + 4C, *Cb 1 y 1’, Cb 5 y 5’, Cb 10 y 10’*); 147.9, 147.4 (s + d, 4C, 2JC-P=5.2, *Cb 2 y 2’*)); 121.7 (s, 4C);(5) ; 165.3 (s, 2C, *C*O).

Experimental details

The hydroformylation reactions were performed in an 80 ml stainless steel home made autoclave. The solution was contained in a glass inlet. The inside autoclave cap is Teflon-covered to avoid direct contact of the solution with the steel. The solution was magnetically stirred and the temperature was controlled by a water bath circulating through an external jacket. The pressure of the autoclave was kept constant by means of a regulator, connected to a syn-gas reservoir. The evolution of the reaction was monitored by the drop in the reservoir pressure.

*Catalytic Hydroformylation of Styrene. General procedure:*

[Rh2(m-OMe)2(cod)2] and the diphosphite were placed in a Schlenk flask. The flask was purged, and half of the total volume of dry degassed toluene used in the experiment was added. The solution was purged and transferred to the evacuated autoclave, which was pressurized to 30 bar of CO/H2 and incubated for at least 3 h. the autoclave was cooled and partially depressurized and the styrene dissolved in the rest of the toluene was injected into the autoclave, which was then pressurized and heated to the desired reaction conditions. Once the thermal equilibria was reached (5-10 min)., the stirring was turned on. This was considered time 0.. One ml aliquots were removed via the liquid sample valve to measure the selectivity as the reaction proceeded. Conversion and regioselectivity in these samples and in the final solution were directly analyzed by GC. Samples were immediately oxidized with KMnO4/ MgSO4 in acetone to convert the aldehydes in the corresponding acids, which where then analyzed by GC with a chiral column to determine the enantiomeric excess. Some samples were also reduced to alcohols with a suspension of LiAlH4 in THF, and the resulting alcohols were also analyzed in the chiral GC column. However, the first method is more reliable, since the peak separation is better and the R acid shows at higher retention time, which is better for mixtures enriched in the R isomer. Conversions and regioselectivity were determinate by gas chromatography in a Hewlett-Packard G1800A, equipped with a capillary HP5 column (30 m, 0.25 Æ). Enantiomeric excesses were measured with Konik-300C GC equipped with b-cyclodextrin capillary column, Supelco -Dex-120, 30 m 0.25 mm Æ,..


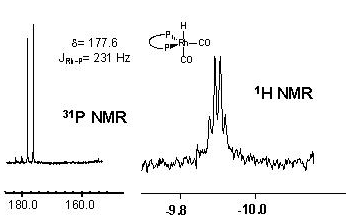


31P{1H} (121.6 MHz) and 1H (300 MHz)HPNMR of a solution of ligand [**1**] and [Rh2(-OMe)2(cod)2].in toluene-d8. Molar ratio [**1**]/Rh= 1.25.30 bar CO/H2. T=25oC

NMR spectra of [RhH(**1**)(PPh3)(CO)] [**4**] in CD2Cl2 (RT). Signals marked as (*) correspond to unreacted [RhH(CO)(PPh3)3].(a) 31P{1H} (101.3 MHz) experimental (above) and simulated (below). 1H NMR (250.0 MHz) hydride region experimental (above) and simulated (below). The rigidity of the chelate is evidenced by the methyl and the methylene regions: the unique (CH3) or collapsed (CH2) signals in the free ligand (a) show at quite distinct field in the chelate complex (b), even at room temperature.

31P{1H} NMR spectra (101.3 MHz, C6D6) for [Rh2H2 (-**2**)(PPh3)4(CO)2], experimental (above) simulated (below). Signals marked as * correspond to unreacted [RhH(CO)(PPh3)3].
